# Supplementary material for: Transient receptor potential Ankyrin‐1 (TRPA1) agonists suppress myelination and induce demyelination in organotypic cortical slices
Source: PubMed Central journal article supplement (PMC10953362; doi:10.1002/glia.24347), 2023-02-10

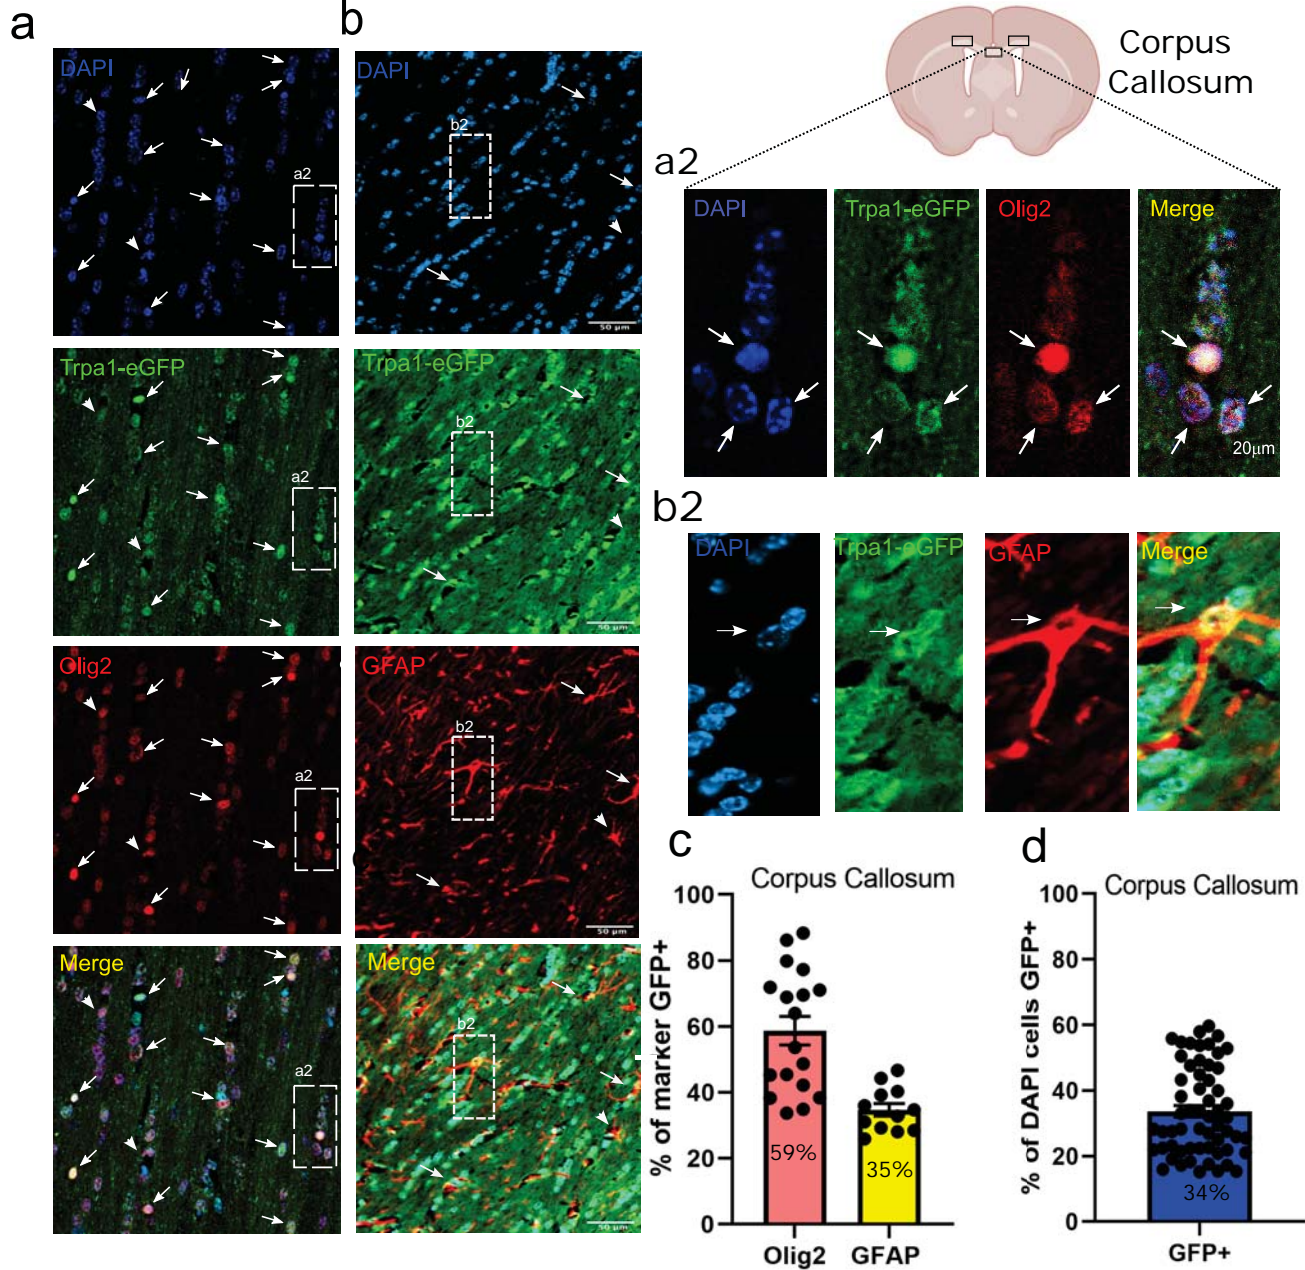

Supplement: GLIA-71-1402-s002.pdf [file GLIA-71-1402-s002.pdf]
